# Supplementary material for: Evaluating the sensitivity of radical chemistry and ozone formation toambient VOCs and NO x in Beijing
Source: Copernicus journal article supplement (doi:10.5194/acp-2020-785), 2020-09-03
Supplement: Supplementary file [file acp-2020-785-AC3-supplement.pdf]

### Short comment by Ezra Wood

This paper presents some very interesting data and analysis from a study in Beijing using state-of-the-art measurements of OH, HO<sub>2</sub>, and RO<sub>2</sub>. Similar to a few other recent studies, the authors find that RO<sub>2</sub> concentrations and instantaneous ozone formation rates are both underestimated by 0-D models under high NO<sub>x</sub> conditions. The authors define the instantaneous rate of ozone production using Equation 11:

$$P(O_3) = (k_{HO_2+NO}[HO_2][NO] + k_{RO_2+NO}[RO_2][NO]) - (k_{OH+NO_2+M}[OH][NO_2][M] + k_{RO_2+NO_2+M}[RO_2][NO_2][M])$$

Similar definitions of P(O<sub>3</sub>) were used in Shirley et al. (2006), Sheehy et al. (2010), Dusanter et al. (2009), and Whalley et al. (2018), in contrast to the simpler earlier definitions which only included the first two terms on the right hand side of the equation, e.g., Kleinman et al. (1994), Thornton et al. (2002), and Ren et al. (2003). The last two terms are included to account for the fact that O<sub>3</sub> is not actually formed if an NO<sub>2</sub> molecule formed by the reaction of NO with HO<sub>2</sub> or RO<sub>2</sub> is then immediately removed by reaction with OH to form HNO<sub>3</sub> or with RO<sub>2</sub> to form a peroxy nitrate. The problem with this definition is that those two NO<sub>2</sub> removal reactions are just two of several Ox loss reactions, where [Ox] = [O] + [O<sub>3</sub>] + [NO<sub>2</sub>] + [O(1D)] + 2[NO<sub>3</sub>] + 3[N<sub>2</sub>O<sub>5</sub>]. For example, the reaction of O(1D) with H<sub>2</sub>O is just as much of an Ox loss mechanism as is the reaction of NO<sub>2</sub> with OH. Including only one Ox loss term in the definition of P(O<sub>3</sub>) is confusing and not quite accurate. It would be much simpler and more accurate to just define the rate of gross Ox production as P(Ox) = k<sub>HO<sub>2</sub>+NO</sub>[HO<sub>2</sub>][NO] + k<sub>RO<sub>2</sub>+NO</sub>[RO<sub>2</sub>][NO] and to separately define L(Ox), which would include the rates of the reactions OH + NO<sub>2</sub>, O(1D) + H<sub>2</sub>O, O<sub>3</sub> + HO<sub>2</sub>, etc. The net rate of peroxy nitrate (RO<sub>2</sub>NO<sub>2</sub>) formation or loss could also be included. It is worth noting that truly defining the instantaneous formation rate of ozone (rather than Ox) necessitates accounting for variations in jNO<sub>2</sub>, e.g. P(O<sub>3</sub>) = jNO<sub>2</sub>[NO<sub>2</sub>] – k[NO][O<sub>3</sub>]. The difficulty of evaluating this expression and its limited utility, especially on days with variable jNO<sub>2</sub> (due to clouds), underscore the advantage of considering Ox rather than O<sub>3</sub>.

Please note the similar open comments made for Dusanter et al., (2009): <https://acp.copernicus.org/preprints/8/S5350/2008/acpd-8-S5350-2008.pdf> References Dusanter, S., Vimal, D., Stevens, P. S., Volkamer, R., and Molina, L. T.: Measurements of OH and HO<sub>2</sub> concentrations during the MCMA-2006 field campaign Part 1: Deployment of the Indiana University laser-induced fluorescence instrument, Atmos. Chem. Phys., 9, 1665-1685, 2009.

**We thank Dr. Wood for his useful comment and agree that it would be more accurate to compare the modelled and measured P(O<sub>3</sub>) rather than the incomplete net P(O<sub>3</sub>) that is in the manuscript currently. The loss terms in the calculation represent only a small subtraction and do not significantly change the differences reported between net P(O<sub>3</sub>) calculated from the measured and modelled peroxy radical concentrations. We will replace Figure 11 with the following figure which shows the modelled and measured P(O<sub>3</sub>) against NO and make the following changes to the text:**

**Pg20, line 613 onwards: By approximating the rate of ozone production to the rate of NO<sub>2</sub> production from the reaction of NO with HO<sub>2</sub> and RO<sub>2</sub> radicals, urban radical measurements can be**

used to estimate chemical ozone formation (Kanaya et al., 2007; Ren et al., 2013; Brune et al., 2016; Tan et al., 2017; Whalley et al., 2018).

$$P(O_x) = (k_{HO_2+NO}[HO_2][NO] + k_{RO_2+NO}[RO_2][NO]) \quad (11)$$

Losses of  $O_x$  ( $L(O_x)$ ) include chemical losses such as the reaction of  $NO_2$  with OH, net PAN formation, the fraction of  $O(^1D)$  (formed by the photolysis of  $O_3$ ) that react with  $H_2O$  and the reaction of  $O_3$  with OH and  $HO_2$ . Physical loss processes, such as  $O_3$  deposition and ventilation out of the model box (see section 2.4) will also contribute to  $L(O_x)$ . Physical processes such as advection of  $O_3$  into the model box would also need to be considered in the model to make a direct comparison to the observed  $O_3$  concentrations.

Considering the chemical production of  $O_x$  (Eq.11), recent studies where OH,  $HO_2$  and  $RO_2$  observations (via  $RO_xLIF$ ) were made, demonstrated that models may under-predict ozone production at high NO due to an underestimation of the  $RO_2$  radical concentrations at high NO concentrations (Tan et al., 2017; Whalley et al., 2018).

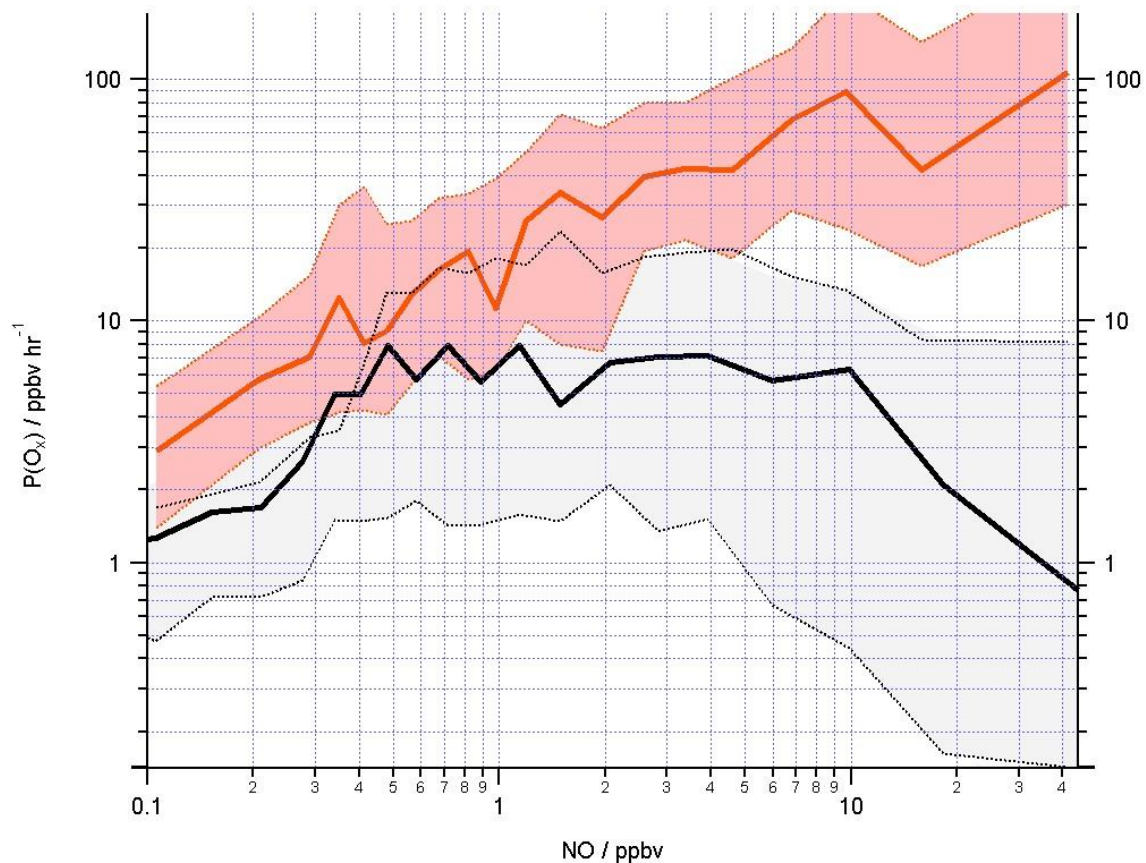

Figure 11: Mean  $O_x$  production ( $ppbv\ hr^{-1}$ ) calculated from observed (red line) and modelled (black line)  $RO_x$  concentrations using Eq. (11) binned over the NO mixing ratio range encountered during the campaign on a logarithmic scale. The shading represents the 25th / 75th percentile confidence limits. The number of data points in each of the NO bins is  $\sim 80$
