# Supplementary material for: Evaluating the sensitivity of radical chemistry and ozone formation toambient VOCs and NO x in Beijing
Source: Copernicus journal article supplement (doi:10.5194/acp-2020-785), 2020-09-03
Supplement: Supplementary file [file acp-2020-785-SC1-supplement.pdf]

This paper presents some very interesting data and analysis from a study in Beijing using state-of-the-art measurements of OH, HO<sub>2</sub>, and RO<sub>2</sub>. Similar to a few other recent studies, the authors find that RO<sub>2</sub> concentrations and instantaneous ozone formation rates are both underestimated by 0-D models under high NO<sub>x</sub> conditions.

The authors define the instantaneous rate of ozone production using Equation 11:

$$P(\text{O}_3) = (k_{\text{HO}_2+\text{NO}}[\text{HO}_2][\text{NO}] + k_{\text{RO}_2+\text{NO}}[\text{RO}_2][\text{NO}]) - (k_{\text{OH}+\text{NO}_2+\text{M}}[\text{OH}][\text{NO}_2][\text{M}] + k_{\text{RO}_2+\text{NO}_2+\text{M}}[\text{RO}_2][\text{NO}_2][\text{M}])$$

Similar definitions of P(O<sub>3</sub>) were used in Shirley et al. (2006), Sheehy et al. (2010), Dusanter et al. (2009), and Whalley et al. (2018), in contrast to the simpler earlier definitions which only included the first two terms on the right hand side of the equation, e.g., Kleinman et al. (1994), Thornton et al (2002), and Ren et al. (2003).

The last two terms are included to account for the fact that O<sub>3</sub> is not actually formed if an NO<sub>2</sub> molecule formed by the reaction of NO with HO<sub>2</sub> or RO<sub>2</sub> is then immediately removed by reaction with OH to form HNO<sub>3</sub> or with RO<sub>2</sub> to form a peroxy nitrate. The problem with this definition is that those two NO<sub>2</sub> removal reactions are just two of several Ox loss reactions, where [Ox] = [O] + [O<sub>3</sub>] + [NO<sub>2</sub>] + [O(<sup>1</sup>D)] + 2[NO<sub>3</sub>] + 3[N<sub>2</sub>O<sub>5</sub>]. For example, the reaction of O(<sup>1</sup>D) with H<sub>2</sub>O is just as much of an Ox loss mechanism as is the reaction of NO<sub>2</sub> with OH. Including only one Ox loss term in the definition of P(O<sub>3</sub>) is confusing and not quite accurate. It would be much simpler and more accurate to just define the rate of gross Ox production as

$$P(\text{O}_x) = k_{\text{HO}_2+\text{NO}}[\text{HO}_2][\text{NO}] + k_{\text{RO}_2+\text{NO}}[\text{RO}_2][\text{NO}]$$

and to separately define L(Ox), which would include the rates of the reactions OH + NO<sub>2</sub>, O(<sup>1</sup>D) + H<sub>2</sub>O, O<sub>3</sub> + HO<sub>2</sub>, etc. The net rate of peroxy nitrate (RO<sub>2</sub>NO<sub>2</sub>) formation or loss could also be included.

It is worth noting that truly defining the *instantaneous* formation rate of ozone (rather than Ox) necessitates accounting for variations in j<sub>NO<sub>2</sub></sub>, e.g. P(O<sub>3</sub>) = j<sub>NO<sub>2</sub></sub>[NO<sub>2</sub>] – k[NO][O<sub>3</sub>]. The difficulty of evaluating this expression and its limited utility, especially on days with variable j<sub>NO<sub>2</sub></sub> (due to clouds), underscore the advantage of considering Ox rather than O<sub>3</sub>.

Please note the similar open comments made for Dusanter et al., (2009):

<https://acp.copernicus.org/preprints/8/S5350/2008/acpd-8-S5350-2008.pdf>

## References

Dusanter, S., Vimal, D., Stevens, P. S., Volkamer, R., and Molina, L. T.: Measurements of OH and HO<sub>2</sub> concentrations during the MCMA-2006 field campaign Part 1: Deployment of the Indiana University laser-induced fluorescence instrument, *Atmos. Chem. Phys.*, 9, 1665-1685, 2009.

Kleinman, L., Lee, Y. N., Springston, S. R., Nunnermacker, L., Zhou, X., Brown, R., Hallock, K., Klotz, P., Leahy, D., and Lee, J. H.: Ozone formation at a rural site in the southeastern United States, *Journal of Geophysical Research: Atmospheres*, 99, 3469-3482, 1994.

Ren, X. R., Harder, H., Martinez, M., Leshner, R. L., Oligier, A., Simpas, J. B., Brune, W. H., Schwab, J. J., Demerjian, K. L., He, Y., Zhou, X. L., and Gao, H. G.: OH and HO<sub>2</sub> chemistry in the urban atmosphere of New York City, *Atmospheric Environment*, 37, 3639-3651, 2003.

Sheehy, P. M., Volkamer, R., Molina, L. T., and Molina, M. J.: Oxidative capacity of the Mexico City atmosphere – Part 2: A RO<sub>x</sub> radical cycling perspective, *Atmos. Chem. Phys.*, 10, 6993-7008, 10.5194/acp-10-6993-2010, 2010.

Shirley, T. R., Brune, W. H., Ren, X., Mao, J., Leshner, R., Cardenas, B., Volkamer, R., Molina, L. T., Molina, M. J., Lamb, B., Velasco, E., Jobson, T., and Alexander, M.: Atmospheric oxidation in the Mexico City Metropolitan Area (MCMA) during April 2003, *Atmos. Chem. Phys.*, 6, 2753-2765, 2006.

Thornton, J. A., Wooldridge, P. J., Cohen, R. C., Martinez, M., Harder, H., Brune, W. H., Williams, E. J., Roberts, J. M., Fehsenfeld, F. C., Hall, S. R., Shetter, R. E., Wert, B. P., and Fried, A.: Ozone production rates as a function of NO<sub>x</sub> abundances and HO<sub>x</sub> production rates in the Nashville urban plume, *Journal of Geophysical Research-Atmospheres*, 107, 4146, 2002.

Whalley, L. K., Stone, D., Dunmore, R., Hamilton, J., Hopkins, J. R., Lee, J. D., Lewis, A. C., Williams, P., Kleffmann, J., Laufs, S., Woodward-Massey, R., and Heard, D. E.: Understanding in situ ozone production in the summertime through radical observations and modelling studies during the Clean air for London project (ClearLo), *Atmos. Chem. Phys.*, 18, 2547-2571, 10.5194/acp-18-2547-2018, 2018.
